# Supplementary material for: Effectiveness of intraoperative periarticular cocktail injection for pain control and knee motion recovery after total knee replacement
Source: PubMed Central journal article supplement — Arthroplast Today. 2019 Jul 12;5(3):320–4. doi: 10.1016/j.artd.2019.05.004 (PMC6728801; doi:10.1016/j.artd.2019.05.004), 2019-07-12
Supplement: mmc3.pdf [file mmc3.pdf]

# INDIVIDUAL CONFLICT OF INTEREST STATEMENT

## *American Association of Hip and Knee Surgeons*

(Adopted from the American Academy of Orthopaedic Surgeons disclosure statement)

**Manuscript Title: Effectiveness of intra-operative peri-articular cocktail injection for pain control and knee motion recovery after total knee replacement**

1. Royalties from a company or supplier (The following conflicts were disclosed)  
**None**
2. Speakers bureau/paid presentations for a company or supplier (The following conflicts were disclosed)  
**None**
- 3A. Paid employee for a company or supplier (The following conflicts were disclosed)  
**None**
- 3B. Paid consultant for a company or supplier (The following conflicts were disclosed)  
**None**
- 3C. Unpaid consultants for a company or supplier (The following conflicts were disclosed)  
**None**
4. Stock or stock options in a company or supplier (The following conflicts were disclosed)  
**None**
5. Research support from a company or supplier as a Principal Investigator (The following conflicts were disclosed)  
**None**
6. Other financial or material support from a company or supplier (The following conflicts were disclosed)  
**None**
7. Royalties, financial or material support from publishers (The following conflicts were disclosed)  
**None**
8. Medical/Orthopaedic publications editorial/governing board (The following conflicts were disclosed)  
**None**
9. Board member/committee appointments for a society (The following conflicts were disclosed)  
**None**

Dr Riju R



03/11/2018

---

Author Name (Print or Type)

Author Signature

Date
